# Supplementary material for: Use of proton pump inhibitors to treat persistent throat symptoms: multicentre, double blind, randomised, placebo controlled trial
Source: PubMed Central journal article supplement (PMC7789994; doi:10.1136/bmj.m4903), 2021-01-07

# The Trial of Proton Pump Inhibitors in Throat Symptoms – Supplementary Appendix

## Contents:

|                                                                                                                                                                                                               |   |
|---------------------------------------------------------------------------------------------------------------------------------------------------------------------------------------------------------------|---|
| Table 1 The Reflux Symptom Index .....                                                                                                                                                                        | 2 |
| Table 2 Baseline demographic characteristics and stratification variables, all randomised patients and pragmatic ITT population .....                                                                         | 3 |
| Table 3 Individual RSI item median scores at baseline and 16 weeks, for the compliant population....                                                                                                          | 6 |
| Table 4 Primary outcome measure RSI, pragmatic ITT population.....                                                                                                                                            | 8 |
| Table 5 Multilevel mixed effect linear regression at 12 months, compliant ITT population.....                                                                                                                 | 8 |
| Table 6 Comprehensive Reflux Symptom Score total scores at 16 weeks, compliant population.....                                                                                                                | 9 |
| <br>                                                                                                                                                                                                          |   |
| Figure 1 Reflux Symptom Index score at baseline and follow-up visits for the compliant population (n=220) (median, interquartile range (IQR), upper and lower adjacent values (+/-1.5xIQR) and outlier) ..... | 5 |
| Figure 2 Laryngopharyngeal Reflux Health Related Quality of Life, compliant population. ....                                                                                                                  | 9 |

Table 1 The Reflux Symptom Index

Permission to use in the trial and reproduce for publication obtained from the authors. The use of the Reflux Symptom Index (RSI) without the 9<sup>th</sup> item (RSI- Heartburn score, RSI-HB) was devised specifically for TOPPITS.

Within the last MONTH, how did the following problems affect you?

0 = no problem 5 = severe problem

|                                                                       |   |   |   |   |   |   |
|-----------------------------------------------------------------------|---|---|---|---|---|---|
| Hoarseness or a problem with your voice                               | 0 | 1 | 2 | 3 | 4 | 5 |
| Clearing your throat                                                  | 0 | 1 | 2 | 3 | 4 | 5 |
| Excess throat mucus or postnasal drip                                 | 0 | 1 | 2 | 3 | 4 | 5 |
| Difficulty swallowing food, liquids or tablets                        | 0 | 1 | 2 | 3 | 4 | 5 |
| Coughing after eating or lying down                                   | 0 | 1 | 2 | 3 | 4 | 5 |
| Breathing difficulties or choking episodes                            | 0 | 1 | 2 | 3 | 4 | 5 |
| Troublesome or annoying cough                                         | 0 | 1 | 2 | 3 | 4 | 5 |
| Sensation of something caught in your throat or a lump in your throat | 0 | 1 | 2 | 3 | 4 | 5 |
| Heartburn, indigestion or stomach acid coming up                      | 0 | 1 | 2 | 3 | 4 | 5 |

|              |  |                                    |  |
|--------------|--|------------------------------------|--|
| <b>TOTAL</b> |  | <b>TOTAL minus heartburn score</b> |  |
|--------------|--|------------------------------------|--|

**Table 2 Baseline demographic characteristics and stratification variables, all randomised patients and pragmatic ITT population**

| Variable           |           | All randomised patients (n=346) |             |             | Pragmatic ITT population (n=267) |             |             |
|--------------------|-----------|---------------------------------|-------------|-------------|----------------------------------|-------------|-------------|
|                    |           | Lansoprazole                    | Placebo     | Total       | Lansoprazole                     | Placebo     | Total       |
| Gender             | Male      | 71 (41%)                        | 79 (45%)    | 150 (43%)   | 49 (39%)                         | 65 (46%)    | 114 (43%)   |
|                    | Female    | 101 (59%)                       | 95 (55%)    | 196 (57%)   | 78 (61%)                         | 75 (54%)    | 153 (57%)   |
| Age (years)        | Mean (SD) | 53.5 (13.3)                     | 50.8 (13.9) | 52.2 (13.7) | 54.8 (12.8)                      | 52.3 (13.7) | 53.5 (13.3) |
|                    | Range     | (21,84)                         | (20,80)     | (20, 84)    | (23, 84)                         | (21, 80)    | (21,84)     |
| Body Mass Index    | n         | 169                             | 170         | 339         | 125                              | 140         | 265         |
|                    | Mean (SD) | 28.2 (5.9)                      | 28.1 (5.3)  | 28.1 (5.6)  | 28.1 (6.3)                       | 28.1 (5.3)  | 28.1 (5.8)  |
|                    | Range     | (11.3,56.9)                     | (18.3,49.1) | (11.3,56.9) | (11.3,56.9)                      | (18.3,49.1) | (11.3,56.9) |
| RSI                | n         | 171                             | 171         | 342         | 127                              | 140         | 267         |
|                    | Mean (SD) | 21.7 (7.4)                      | 22.1 (7.0)  | 21,9 (7.2)  | 21.7 (7.4)                       | 21.9 (7.0)  | 21.8 (7.2)  |
|                    | Range     | (10,41)                         | (10,43)     | (10,43)     | (10, 41)                         | (10, 43)    | (10, 43)    |
| RSI-HB             | n         | 171                             | 171         | 342         | 127                              | 140         | 267         |
|                    | Mean (SD) | 20.0 (6.8)                      | 20.1 (6.5)  | 20.1 (6.6)  | 20.0 (6.9)                       | 20.0 (6.5)  | 20.0 (6.7)  |
|                    | Range     | (10,38)                         | (10,38)     | (10,38)     | (10,38)                          | (10,38)     | (10,38)     |
| Severity category* | Mild      | 91 (53%)                        | 93 (53%)    | 184 (53%)   | 69 (54%)                         | 72 (51%)    | 141 (53%)   |
|                    | Severe    | 81 (47%)                        | 81 (47%)    | 162 (47%)   | 58 (46%)                         | 68 (49%)    | 126 (47%)   |

\* Stratification Factor at Randomisation: Mild ( $10 \leq \text{RSI-HB} \leq 20$ ), Severe ( $\text{RSI-HB} > 20$ )

### **Patient Reported Satisfaction**

At the 12-month follow-up (visit 3), 213 out of 346 (62%) participants answered the satisfaction question, of whom 115 (54%) were very satisfied, 59 (28%) were satisfied, 29 (14%) were neither satisfied nor dissatisfied, five (2%) were dissatisfied and five (2%) were very dissatisfied.

Figure 1 Reflux Symptom Index score at baseline and follow-up visits for the compliant population (n=220) (median, interquartile range (IQR), upper and lower adjacent values (+/-1.5xIQR) and outlier)

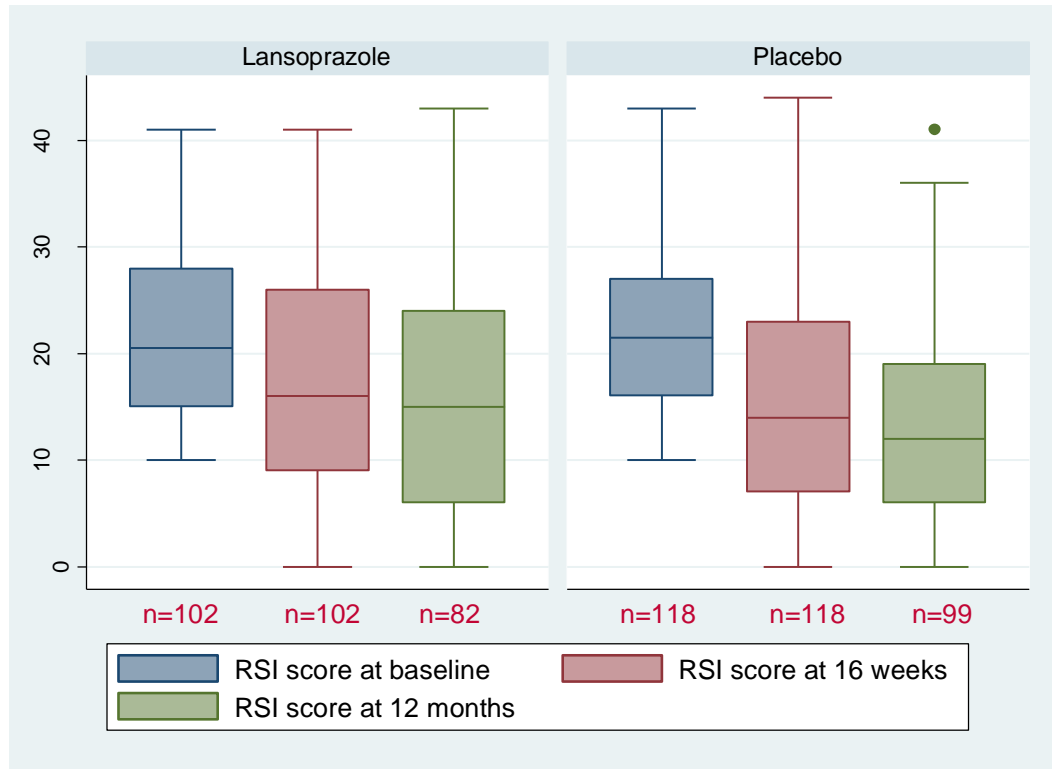

Table 3 Individual RSI item median scores at baseline and 16 weeks, for the compliant population.

| RSI items                                          | Lansoprazole group median score (LQ, UQ) n=102 |            |            | Placebo group median score (LQ, UQ) n=118 |          |              |
|----------------------------------------------------|------------------------------------------------|------------|------------|-------------------------------------------|----------|--------------|
|                                                    | baseline                                       | 16 week    | change     | baseline                                  | 16 week  | change       |
| 1 - Hoarseness                                     | 2.5 (1,4)                                      | 1 (0, 3)   | 0 (-1, 0)  | 3 (1, 4)                                  | 2 (0, 3) | 0 (-2, 0)    |
| 2 – Throat clearing                                | 4 (3, 4)                                       | 3 (1, 4)   | 0 (-2, 0)  | 3 (3, 4)                                  | 2 (1, 4) | -1 (-2, 0)   |
| 3 - Excess throat mucus or postnasal drip          | 3 (2, 4)                                       | 3 (1, 4)   | 0 (-1, 0)  | 3 (2, 4)                                  | 2 (1, 4) | -1 (-2, 0)   |
| 4 - Difficulty swallowing food, liquids or tablets | 1 (0, 3)                                       | 1 (0, 2)   | 0 (-1, 0)  | 1 (0, 3)                                  | 0 (0, 2) | 0 (-2, 0)    |
| 5 - Coughing after eating or lying down            | 2 (0, 3)                                       | 1.5 (0, 3) | 0 (-1, 0)  | 2 (1, 4)                                  | 1 (0, 3) | 0 (-2, 0)    |
| 6 - Breathing difficulties or choking episodes     | 1 (0, 3)                                       | 0 (0, 3)   | 0 (-1, 0)  | 1 (0, 3)                                  | 0 (0, 2) | 0 (-1, 0)    |
| 7 - Troublesome or annoying cough                  | 3 (1, 4)                                       | 2 (0, 4)   | 0 (-1, 0)  | 3 (1, 4)                                  | 1 (0, 3) | -0.5 (-2, 0) |
| 8 - Lump in the throat sensation                   | 4 (3, 5)                                       | 3 (1, 4)   | -1 (-2, 0) | 4 (2, 5)                                  | 2 (1, 4) | -1 (-2, 0)   |

|                                                            |          |          |           |          |          |           |
|------------------------------------------------------------|----------|----------|-----------|----------|----------|-----------|
| 9 - Heartburn, indigestion<br>or stomach acid coming<br>up | 1 (0, 3) | 1 (0, 2) | 0 (-1, 0) | 2 (1, 3) | 1 (0, 3) | 0 (-1, 1) |
|------------------------------------------------------------|----------|----------|-----------|----------|----------|-----------|

**LQ = Lower Quartile, UQ = Upper Quartile**

**Table 4 Primary outcome measure RSI, pragmatic ITT population**

|               | Baseline (Visit 1)      |                    | 16 weeks (Visit 2)      |                        |
|---------------|-------------------------|--------------------|-------------------------|------------------------|
|               | Lansoprazole<br>(N=127) | Placebo<br>(N=140) | Lansoprazole<br>(N=127) | Placebo<br>(N=140)     |
| Median (IQR)  | 21 (16, 26)             | 22 (16, 27)        | 15 (9, 25)              | 15 (8, 23)             |
| Mean (SD); CI | 21.7 (7.4)              | 21.9 (7.0)         | 17.1 (9.6); 15.5, 18.8  | 16.0 (9.5); 14.4, 17.6 |
| Range         | (10, 41)                | (10, 43)           | (0, 41)                 | (0, 44)                |

CI = 95% confidence interval about mean

**Table 5 Multilevel mixed effect linear regression at 12 months, compliant ITT population**

| Model (n=185)*                                  | $\beta$ | se ( $\beta$ ) | Test statistic | p-value | 95% CI ( $\beta$ ) |        |
|-------------------------------------------------|---------|----------------|----------------|---------|--------------------|--------|
|                                                 |         |                |                |         | lower              | upper  |
| Group (ref = Placebo)<br>Lansoprazole           | 2.469   | 1.311          | 1.88           | 0.060   | -0.100             | 5.038  |
| RSI-HB baseline severity: (ref =Mild)<br>Severe | 8.233   | 1.314          | 6.27           | <0.001  | 5.658              | 10.808 |
| Constant                                        | 19.149  | 4.405          | 4.35           | <0.001  | 10.515             | 27.784 |



Table 6 Comprehensive Reflux Symptom Score total scores at 16 weeks, compliant population.

| CReSS            | Total (range: 0-170) |              |
|------------------|----------------------|--------------|
|                  | Lansoprazole         | Placebo      |
| n                | 102                  | 118          |
| Median (LQ, UQ)  | 36 (15,55)           | 27.5 (14,48) |
| Mean (SD)        | 38.9 (27.7)          | 34.7 (28.3)  |
| 95% CI           | (33.4, 44.3)         | (29.6, 39.9) |
| Range (min, max) | (2,140)              | (0,158)      |

Figure 2 Laryngopharyngeal Reflux Health Related Quality of Life, compliant population.

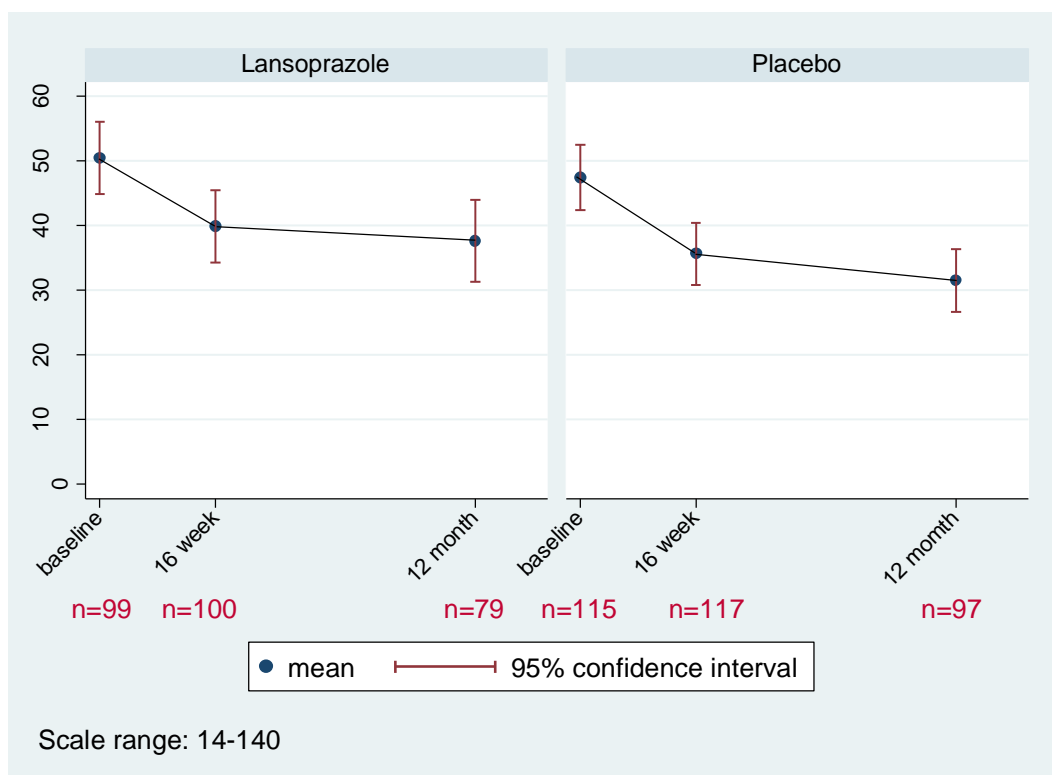

Supplement: ohaj058384.ww.pdf [file ohaj058384.ww.pdf]
